# Supplementary material
Source: PubMed Central journal article supplement (PMC3567654)
Supplement: supp_M112.425728_jbc.M112.425728-1.pdf [file supp_M112.425728_jbc.M112.425728-1.pdf]

### Supplementary information

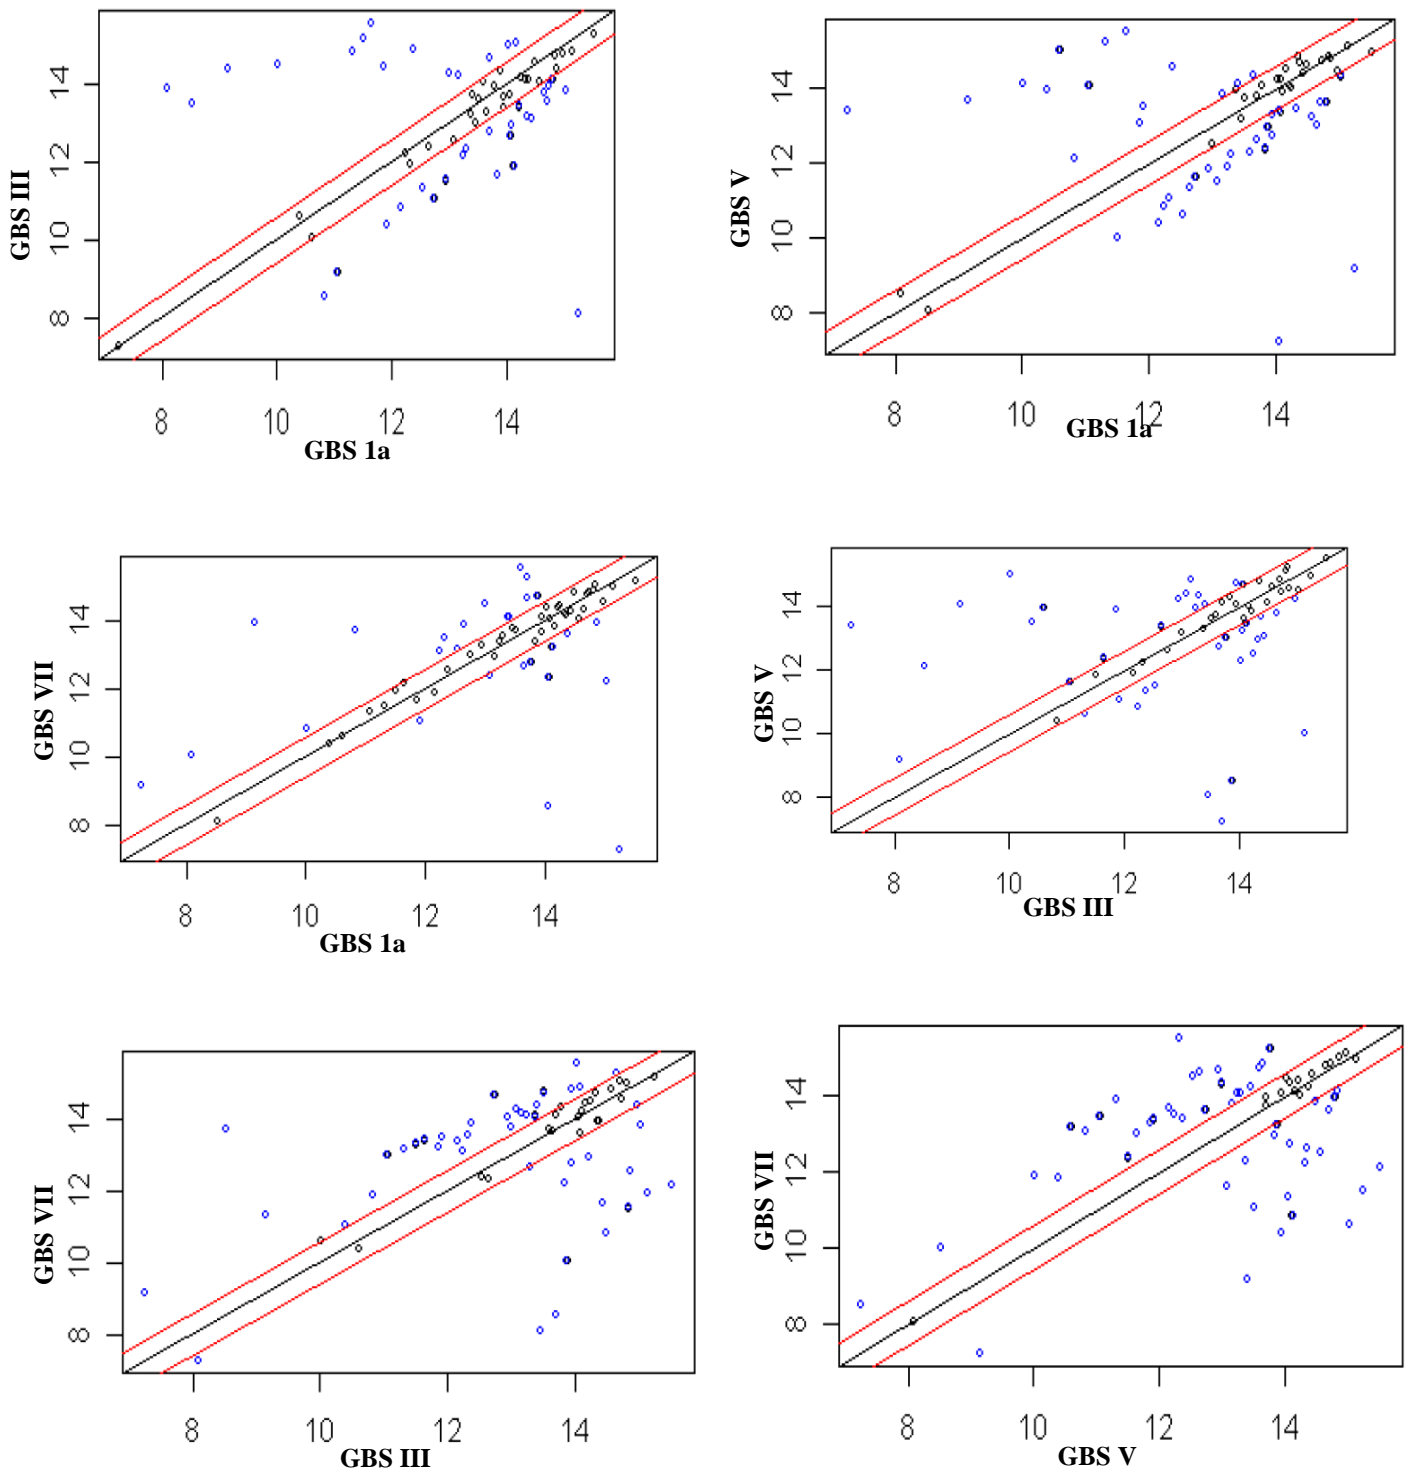

**Figure S1:** Bivariate scatter plot for GBS 1a vs III, V, VII, III vs V, III vs VII and V vs VII.

**Table S1:** GBS serotypes and strains used in this study\*.

| <b>S. No.</b> | <b>Serotypes</b> |
|---------------|------------------|
| 1             | 1a               |
| 2             | III              |
| 3             | V                |
| 4             | VII              |
| 5             | USA 1a A909      |
| 6             | USA V CJB111     |

\*Indian GBS serotypes were selected from our unpublished data  
USA serotypes were obtained from Dr. L.C. Paoletti, Channing laboratory,  
Harvard Medical School, Boston

**Table S2: List of GBS virulence factors genes used for Comparative Microarray analysis**

| S.No | Virulence factors                    | Related genes | <i>S. agalactiae</i> A909<br>(serotype 1a)<br>NC_007432<br>(2127839 bp) | <i>S. agalactiae</i> NEM316<br>(serotype III)<br>NC_004368<br>(2211485 bp) | <i>S. agalactiae</i> 2603V/R<br>(serotype V)<br>NC_004116<br>(2160267 bp) |         |
|------|--------------------------------------|---------------|-------------------------------------------------------------------------|----------------------------------------------------------------------------|---------------------------------------------------------------------------|---------|
| 1    | Agglutinin receptor                  | -             |                                                                         | gbs1356                                                                    | SAG1283                                                                   |         |
| 2    | Fibronectin Binding protein          | pavA          | SAK_1277                                                                | gbs1263                                                                    | SAG1190                                                                   |         |
| 3    |                                      |               | SAK_1142                                                                | gbs1087                                                                    | SAG1052*                                                                  |         |
| 4    |                                      |               | SAK_0955                                                                | gbs0850                                                                    | SAG0832                                                                   |         |
| 5    | Laminin-binding protein              | Lmb           | SAK_1319                                                                | gbs1307                                                                    | SAG1234                                                                   |         |
| 6    | Glucan Binding Protein               | Grab          |                                                                         |                                                                            |                                                                           |         |
| 7    | Pilus Island1                        |               | SAK_0776                                                                | gbs0628                                                                    | SAG0645                                                                   |         |
| 8    |                                      |               | SAK_0777                                                                | gbs0629                                                                    | SAG0646                                                                   |         |
| 9    |                                      |               | SAK_0778                                                                | gbs0630                                                                    | SAG0647                                                                   |         |
| 10   |                                      |               | SAK_0779                                                                | gbs0631                                                                    | SAG0648                                                                   |         |
| 11   |                                      |               | SAK_0780                                                                | gbs0632                                                                    | SAG0649                                                                   |         |
| 12   | Pilus Island2                        |               |                                                                         | gbs1474                                                                    | SAG1404                                                                   |         |
| 13   |                                      |               |                                                                         | gbs1475                                                                    | SAG1405                                                                   |         |
| 14   |                                      |               |                                                                         | gbs1476                                                                    | SAG1406                                                                   |         |
| 15   |                                      |               |                                                                         | gbs1477                                                                    | SAG1407                                                                   |         |
| 16   |                                      |               | -                                                                       |                                                                            | gbs1478                                                                   | SAG1408 |
| 17   | Streptococcal plasmin receptor/GAPDH | plr/gapA      | SAK_1790                                                                | gbs1811                                                                    | SAG1768                                                                   |         |
| 18   | Hyaluronidase                        | hylB          | SAK_1284                                                                | gbs1270                                                                    | SAG1197                                                                   |         |
| 19   | Streptococcal enolase                | Eno           | SAK_0713                                                                | gbs0608                                                                    | SAG0628                                                                   |         |
| 20   | Capsule                              | -             | SAK_1247                                                                | gbs1233                                                                    | SAG1158                                                                   |         |
| 21   |                                      |               | SAK_1248                                                                | gbs1234                                                                    | SAG1159                                                                   |         |
| 22   |                                      |               | SAK_1249                                                                | gbs1235                                                                    | SAG1160                                                                   |         |
| 23   |                                      |               | SAK_1250                                                                | gbs1236                                                                    | SAG1161                                                                   |         |
| 24   |                                      |               | SAK_1251                                                                | gbs1237                                                                    | SAG1162                                                                   |         |
| 25   |                                      |               | SAK_1252                                                                | gbs1237.1                                                                  | SAG1163                                                                   |         |
| 26   |                                      |               | SAK_1253                                                                | gbs1238                                                                    |                                                                           |         |
| 27   |                                      |               |                                                                         |                                                                            |                                                                           | SAG1164 |
| 28   |                                      |               |                                                                         |                                                                            | SAK_1254                                                                  | gbs1239 |

|           |                                                             |           |          |         |          |
|-----------|-------------------------------------------------------------|-----------|----------|---------|----------|
| <b>29</b> |                                                             |           |          |         | SAG1165  |
| <b>30</b> |                                                             |           | SAK_1255 |         |          |
| <b>31</b> |                                                             |           |          |         |          |
| <b>32</b> |                                                             |           |          | gbs1240 |          |
| <b>33</b> |                                                             |           |          |         | SAG1166  |
| <b>34</b> |                                                             |           |          |         | SAG1167  |
| <b>35</b> |                                                             |           |          |         | SAG1168  |
| <b>36</b> |                                                             |           | SAK_1256 | gbs1241 | SAG1169  |
| <b>37</b> |                                                             |           | SAK_1257 | gbs1242 | SAG1170  |
|           |                                                             |           |          |         |          |
| <b>38</b> |                                                             |           | SAK_1258 | gbs1243 | SAG1171  |
| <b>39</b> |                                                             |           | SAK_1259 | gbs1244 | SAG1172  |
| <b>40</b> |                                                             |           | SAK_1260 | gbs1245 | SAG1173  |
| <b>41</b> |                                                             |           | SAK_1261 | gbs1246 | SAG1174  |
| <b>42</b> |                                                             |           | SAK_1262 | gbs1247 | SAG1175  |
| <b>43</b> |                                                             |           | SAK_1263 | gbs1248 | SAG1176  |
| <b>44</b> | Alpha C protein                                             | Bca       | SAK_0517 |         |          |
| <b>45</b> | Alpha-like protein                                          | alp2      |          | gbs0470 |          |
| <b>46</b> | B C protein                                                 | Cba       | SAK_0186 |         |          |
| <b>47</b> | Rib                                                         | Rib       |          |         | SAG0433  |
| <b>48</b> | Surface immunogenic protein                                 | Sip       | SAK_0065 | gbs0031 | SAG0032  |
| <b>49</b> | Pneumococcal surface antigen A / Metal binding protein SloC | psaA      | SAK_1556 | gbs1589 | SAG1533  |
| <b>50</b> | C3-degrading protease                                       | cppA      | SAK_1738 | gbs1775 | SAG1730  |
| <b>51</b> | C5a peptidase                                               | scpA/scpB | SAK_1320 | gbs1308 | SAG1236* |
| <b>52</b> | Serine protease                                             | htrA/degP | SAK_2135 | gbs2133 | SAG2174  |
| <b>53</b> | Trigger factor                                              | tig/ropA  | SAK_0155 | gbs0104 | SAG0105  |
| <b>54</b> | B-hemolysin/cytolysin                                       | cylX      | SAK_0790 | gbs0644 | SAG0662  |
| <b>55</b> |                                                             | cylD      | SAK_0791 | gbs0645 | SAG0663  |
| <b>56</b> |                                                             | cylG      | SAK_0792 | gbs0646 | SAG0664  |
| <b>57</b> |                                                             | acpC      | SAK_0793 | gbs0647 | SAG0665  |
| <b>58</b> |                                                             | cylZ      | SAK_0794 | gbs0648 | SAG0666  |
| <b>59</b> |                                                             | cylA      | SAK_0795 | gbs0649 | SAG0667  |
| <b>60</b> |                                                             | cylB      | SAK_0796 | gbs0650 | SAG0668  |
| <b>61</b> |                                                             | cylE      | SAK_0797 | gbs0651 | SAG0669  |
| <b>62</b> |                                                             | cylF      | SAK_0798 | gbs0652 | SAG0670  |

|           |             |         |          |         |         |
|-----------|-------------|---------|----------|---------|---------|
| <b>63</b> |             | cylI    | SAK_0799 | gbs0653 | SAG0671 |
| <b>64</b> |             | cylJ    | SAK_0800 | gbs0654 | SAG0672 |
| <b>65</b> |             | cylK    | SAK_0801 | gbs0655 | SAG0673 |
| <b>66</b> | CAMP factor | cfa/cfb | SAK_1983 | gbs2000 | SAG2043 |

**Table S3: List of Oligo designed for GBS virulence factor genes**

| Row<br>384 | Column<br>384 | Gene name                              | Oligo name       | Oligo sequence                                      | Productive<br>control |
|------------|---------------|----------------------------------------|------------------|-----------------------------------------------------|-----------------------|
| A          | 1             | Agglutinin receptor                    | ObsCa031#0050    | GTTTGATATGACGAAGACACAAGCGGAGAATAGCGACTATGACTTAACCT  |                       |
| A          | 2             | Agglutinin receptor                    | ObsCa031#0104    | CAAACCCTGTATCTGAACAACTGAAAGTATGGCATCAACTGGACAATCT   |                       |
| A          | 3             | Fibronectin Binding protein            | ObsCa031#0001    | TCACCTACCTTGAATCTGTTGAAACATCGCTAAATCATGCTTCTATGGAA  |                       |
| A          | 4             | Fibronectin Binding protein            | ObsCa031#0106    | CCTAAAACAGGTGATGATCAAAATGTCATTTTTAACTTGTAGGTTTTGG   |                       |
| A          | 5             | Fibronectin Binding protein            | ObsCa031#0053    | AGAGAAGATACAGCTCGTCTTGAGAATATGATTTGGAATCGTGCTTACCA  |                       |
| A          | 6             | Laminin-binding protein                | ObsCa031#0054    | GACTACTAGATAGAGTCAAAGGGCTAGAAGATATGGAAGTCACACAAGGCA |                       |
| A          | 7             | Glucan binding protein                 | ObsCa031#0055    | GTTCATACTGGTGGGAAACGATTTGTAAAGAAAGACTCAACAGAAACACA  |                       |
| A          | 8             | <b>Production control</b>              | obsprodentrl#033 | CATATCAAGTGTTATGAGGGCAATTCGCAGCCATACTCAGATTTCCGCCCG | Alien 2               |
| A          | 9             | Pilus island 1                         | ObsCa031#0004    | CCACTACTAATCAACAAGGAAAGGCTACATTTAACCAACTACCAGATGGA  |                       |
| A          | 10            | Pilus island 1                         | ObsCa031#0005    | TGAACACATCGGCGGAAAGATTGCTTATCAGGTAGACCAAATCAAAGTTA  |                       |
| A          | 11            | Pilus island 1                         | ObsCa031#0006    | TTTGTGATGGGAAGTCTGATTCTTATTTCCGATTGTGAGCCAGGTAAG    |                       |
| A          | 12            | Pilus island 1                         | ObsCa031#0007    | CTATTCGTGATTTCCCAATTCCTCAAAATTCGTGATGTTTCGTGAGTTCCG |                       |
| A          | 13            | Pilus island 2                         | ObsCa031#0060    | ACTGGTTACCGTATATCTATGAAGGATGCTGTAGTTGCTGTAGTTGCTAA  |                       |
| A          | 14            | Pilus island 2                         | ObsCa031#0061    | CTTATAATAGAACACTGGACCCAAGCCGCCTATCAGATCCCTATACTGAA  |                       |
| A          | 15            | Pilus island 2                         | ObsCa031#0062    | ACACCCGATAACTTTTCAGATTTGTTGGTTGTTTCCTGGACATGATTATGC |                       |
| A          | 16            | Pilus island 2                         | ObsCa031#0063    | GTAATAACCCAACGGAAGAAAGTGAACCACAAGAAGGTACTCCAGCTAAC  |                       |
| A          | 17            | Pilus island 2                         | ObsCa031#0117    | AATACCAAAGATTCTGATAACCCAACACCATTGAACCCAAGTGAACCAAA  |                       |
| A          | 18            | Pilus island 2                         | ObsCa031#0064    | TTGTCGCAAATACCGCTTAATACCAATGTTTTAGGGGAAAGTACCGTACC  |                       |
| A          | 19            | Streptococcalplasmin<br>receptor/GAPDH | ObsCa031#0009    | GTTATCTCAGGTGCTTCATGTACTACAACTGTCTTGCTCCAATGGCTAA   |                       |
| A          | 20            | Hyaluronidase                          | ObsCa031#0010    | GCACTATTGATATTGAACGCAAAGAGCAAACAGGTACTTGAACAGCATT   |                       |
| A          | 21            | Streptococcal enolase                  | ObsCa031#0011    | AACCCAACACTTGAAGTAGAAGTTTATACAGAATCAGGTGCTTTCCGGACG |                       |
| A          | 22            | Capsule                                | ObsCa031#0012    | AGGAAGCAATGGAGTATTATTCTTCACATGATGTTGACAATGTTGTAAGT  |                       |

|          |    |                             |                 |                                                     |         |
|----------|----|-----------------------------|-----------------|-----------------------------------------------------|---------|
| <b>A</b> | 23 | Capsule                     | ObsCa031#0013   | CGCTCATTGAACATCATACTGTTGTAGAATCACACTGTAATATAGCACCT  |         |
| <b>A</b> | 24 | Capsule                     | ObsCa031#0014   | ACCAGTTGTGAATGTAGCGTTGATTATAATGTCCCAGTATGCCACCTTC   |         |
| <b>B</b> | 1  | Capsule                     | ObsCa031#0015   | TATTCGGATCATTCAATTGGATCAGAAGTACCTATCGCAGCAGCAGCAAT  |         |
| <b>B</b> | 2  | Capsule                     | ObsCa031#0016   | ACGACATGGATTCCATTGGGACATTATTAGCTGCTGGTGTA AATTGGTT  |         |
| <b>B</b> | 3  | Capsule                     | ObsCa031#0017   | ACTATAACTCCAAAGTCAGTATTATTGTTGACACAGCCACTTGCACAAGA  |         |
| <b>B</b> | 4  | Capsule                     | ObsCa031#0018   | TGGTGGGTTGTCAGAAGCTAGAACTATGGAATTTATCATTCAAAGGGAA   |         |
| <b>B</b> | 5  | Capsule                     | ObsCa031#0128   | AAGAGAGAATTATTTTCTACGCTGTGCTATCCAGTAGGGAAGTTACACGA  |         |
| <b>B</b> | 6  | Capsule                     | ObsCa031#0019   | ATACCTATATACTCAGAAGCATACTTAAAGAATGTGTGCAATCCGT      |         |
| <b>B</b> | 7  | Capsule                     | ObsCa031#0129   | ACTTTAGAGGTGGCGTTGGAAGAAATGTATTATGGGAAACTTATGGAGT   |         |
| <b>B</b> | 8  | <b>Production control</b>   | obsprodctrl#034 | CAATCAGTTAGAAACAGTGGCTTGCATATAAGCGTATCCACGCGGCACA   | Alien 7 |
| <b>B</b> | 9  | Capsule                     | ObsCa031#0020   | AGGAGTTAAAGAGTTATGGTTAAATAGTGATCTACCTTTGGGGTTCGATT  |         |
| <b>B</b> | 10 | Capsule                     | ObsCa031#0076   | TGCTGAAGCCAACTTTATTTGGAAGAGAATTGTTTTCAATAGAGTGGTTT  |         |
| <b>B</b> | 11 | Capsule                     | ObsCa031#0130   | TGGCGGTAAGCATTACGCCTATAATCTAGCAATGAGATATATGCAACCAA  |         |
| <b>B</b> | 12 | Capsule                     | ObsCa031#0131   | TCTAGCAAGGGAGATTAGTTGTGATGTGAATACAGGATTAATAATTGGCG  |         |
| <b>B</b> | 13 | Capsule                     | ObsCa031#0132   | ACTGGGTTTAGGCGAGGGAACTCAGCTTACAAAATAGTGATGTTAGTTG   |         |
| <b>B</b> | 14 | Capsule                     | ObsCa031#0021   | TTTTGTCACAGTGGGGACACATGAACAGCAGTTC AACCGTCTTATTAAG  |         |
| <b>B</b> | 15 | Capsule                     | ObsCa031#0022   | TTGGGTAACCTTTGATAAAGAAGATGCTAGGAGTATTCTAAGAGAAGAGA  |         |
| <b>B</b> | 16 | Capsule                     | ObsCa031#0023   | TTTGATATCACGGGTGCTATTATAGGTTTGCTCATATGTGGCATTGTGG   |         |
| <b>B</b> | 17 | Capsule                     | ObsCa031#0024   | ATACTCCACCTATTGGTTTAGTTGTTGATGCCGCAATAATCGCTAATGCT  |         |
| <b>B</b> | 18 | Capsule                     | ObsCa031#0025   | AGAGGATATCACTACTCTTGAGAAGGGAAATTTACCTAAAGCACCATCTT  |         |
| <b>B</b> | 19 | Capsule                     | ObsCa031#0026   | ATACAGCTTTGTCAAATGTTTTAATGCTTGGTATTACACCAGTCGTTGCG  |         |
| <b>B</b> | 20 | Capsule                     | ObsCa031#0027   | AGCATTACCTCACAGCTCCAAACGTCGTTCAAACCTAATATGACTATTGA  |         |
| <b>B</b> | 21 | Capsule                     | ObsCa031#0028   | ACA ACTCTACATTACCCAACCTTCACTTTCAAACGCTGTTAGGAACCTTG |         |
| <b>B</b> | 22 | $\alpha$ -C protein         | ObsCa031#0029   | GGGATGTTTCTCAGTTGCAGAGTACAGGAAGGGCTAGTCTTACCTATAAT  |         |
| <b>B</b> | 23 | $\alpha$ -like protein      | ObsCa031#0084   | AAGACGGAATTGTTGAAGTTCATCCAGATGGTACTGTTGATGATGTG     |         |
| <b>B</b> | 24 | $\beta$ -C protein          | ObsCa031#0030   | ATTGTATAAGGCTATGAGTGAGAGCTTGGAGCAGGTTGAGAAGGAATTA   |         |
| <b>C</b> | 1  | Rib                         | ObsCa031#0138   | ATTATACAGTATTGAAGACAGATGGAAGTCCTCATAACGAAGCCTGATGGA |         |
| <b>C</b> | 2  | Surface immunogenic protein | ObsCa031#0031   | AAGTTTCTCTCAATACAATTCGGAAGGTATGACACCAGAAGCAGCAACA   |         |

|          |    |                                                           |               |                                                      |  |
|----------|----|-----------------------------------------------------------|---------------|------------------------------------------------------|--|
| <b>C</b> | 3  | Pneumococcal surface antigen A/metal binding protein SloC | ObsCa031#0032 | TTGCGGTTAGCGATGGAGTTGATGTTATTTATCTAAATGGTCAAAGCGGA   |  |
| <b>C</b> | 4  | C3 degrading protease                                     | ObsCa031#0033 | ATCGTACTCGTGCGGTGAATGGTACTAAGAAGTTAGCAAAGATTATTGTT   |  |
| <b>C</b> | 5  | C5a peptidase                                             | ObsCa031#0034 | TTCAGCAGCAACGATGTATGTGACAGATAAGGATAATACCTCAAGCAAGG   |  |
| <b>C</b> | 6  | Serine protease                                           | ObsCa031#0035 | ACTGATAAGGGCTTACAAGTTTACGGTGAAGGCTCTGGAGTCATCTATAA   |  |
| <b>C</b> | 7  | Trigger factor                                            | ObsCa031#0036 | TGACTTTGTAGGTTTCAGTTGATGGTGTGGAATTTGATGGTGGTAAAGGAG  |  |
| <b>C</b> | 8  | $\beta$ -hemolysin/ cytolysin                             | ObsCa031#0037 | CAACTGGTTGGAAATATTAGGTATTCTGAGTTTCTTACGGAAGGTGGTGT   |  |
| <b>C</b> | 9  | $\beta$ -hemolysin/ cytolysin                             | ObsCa031#0038 | AGTGGACCAATCTCTTTAACTGGCGTGCGATTAAGGAACTATCATAGAA    |  |
| <b>C</b> | 10 | $\beta$ -hemolysin/ cytolysin                             | ObsCa031#0039 | TGGCGGTATTGATTGTTTGTAGTTAATAATGCTGGTATTGTTAGAGATGGCT |  |
| <b>D</b> | 1  | $\beta$ -hemolysin/ cytolysin                             | ObsCa031#0040 | AGACTAGCAGATTTTGTGATTGAAAATAGTGAGGATATAGATGACCAAGC   |  |
| <b>D</b> | 2  | $\beta$ -hemolysin/ cytolysin                             | ObsCa031#0041 | ATTTTAGATGCACCTTGATGGTAGCCTCCCCTCTCTTGATGAATTAACAGC  |  |
| <b>D</b> | 3  | $\beta$ -hemolysin/ cytolysin                             | ObsCa031#0042 | ATTTATGGGATGCTATCGCACAACTAAATCAACAATCGCAGATGACAGTT   |  |
| <b>D</b> | 4  | $\beta$ -hemolysin/ cytolysin                             | ObsCa031#0043 | TCTTAATGAAGGGTCTATTGCGAAGGTATTTGACAAAGCCAACGAAGCC    |  |
| <b>D</b> | 5  | $\beta$ -hemolysin/ cytolysin                             | ObsCa031#0044 | GAAGGTTATCTTGTGAATGTTCCAGGAAGTTACCCGATTGAGCATGATGA   |  |
| <b>D</b> | 6  | $\beta$ -hemolysin/ cytolysin                             | ObsCa031#0045 | ATGAAATTACTGGTGAAGAATGTGAAGAAGCCTTAGACCTTGTGATTCT    |  |
| <b>D</b> | 7  | $\beta$ -hemolysin/ cytolysin                             | ObsCa031#0046 | AAGGTTTCGTTTGAATGAGCGGAAGAAGGCAGTTAGTTCAGATTATGAT    |  |
| <b>D</b> | 8  | $\beta$ -hemolysin/ cytolysin                             | ObsCa031#0047 | GACTGTACTGCTCAGCTTTGGTACTTCATTTAAACGAGATTGGGTGGAAT   |  |
| <b>D</b> | 9  | $\beta$ -hemolysin/ cytolysin                             | ObsCa031#0048 | ACTCTAATTCTGGTGACTATCATATTCTAACCTATGCTCCCAGTGGTTCA   |  |
| <b>D</b> | 10 | CAMP factor                                               | ObsCa031#0049 | AATTCTATTGGTAGTCGTGTAGAAGCCTTAACAGATGTGATTGAAGCAAT   |  |





**Table S4: Genes up-regulated in GBS type III compared to GBS type 1a (n=14)**

| S.No | locus name on Chip | Gene locus | Gene product name                                           | Gene            | Fold change | Function                                                                                                                                                                           |
|------|--------------------|------------|-------------------------------------------------------------|-----------------|-------------|------------------------------------------------------------------------------------------------------------------------------------------------------------------------------------|
| 1    | Ca031#0009         | gbs1811    | Streptococcal plasmin receptor/GAPDH                        | plr/gapA        | 1.9         | GAPDH, glycolytic enzyme used for bacterial energy generation, bind several host proteins, confer resistance against reactive oxygen species produced by host phagocytic cells (1) |
| 2    | Ca031#0011         | gbs0608    | Streptococcal enolase                                       | Eno             | 2.3         | Glycolytic enzyme $\alpha$ -enolase as a plasmin binding protein on the outside of the bacterial cell (2)                                                                          |
| 3    | Ca031#0022         | gbs1242    | Capsule                                                     | cpsF            | 1.8         | Synthesis of capsular polysaccharide (3)                                                                                                                                           |
| 4    | Ca031#0076         | gbs1240    | Capsule                                                     | cpsI            | 55.5        | Synthesis of capsular polysaccharide (3)                                                                                                                                           |
| 5    | Ca031#0130         | -          | Capsule                                                     | -               | 5.9         | Synthesis of capsular polysaccharide (3)                                                                                                                                           |
| 6    | Ca031#0032         | gbs1589    | Pneumococcal surface antigen A / Metal binding protein SloC | psaA            | 1.9         | Essential virulence factor, a metal ( $Mn^{2+}$ and $Zn^{2+}$ ) Binding protein (ABC-type),<br>Potential drug target and a candidate vaccine component                             |
| 7    | Ca031#0055         | -          | Glucan binding protein                                      | gbpC/gbpD /grab | 37.4        | GbpB may be involved in cell wall synthesis (4)                                                                                                                                    |
| 8    | Ca031#0060         | gbs1474    | Pilus island 2                                              | -               | 11.4        | Pilus oligomerization and polymerization and sortase enzyme for anchoring at the membrane formation (5)                                                                            |
| 9    | Ca031#0061         | gbs1475    | Pilus island 2                                              | -               | 14.7        | Do                                                                                                                                                                                 |
| 10   | Ca031#0062         | gbs1476    | Pilus island 2                                              | -               | 5.6         | Do                                                                                                                                                                                 |
| 11   | Ca031#0064         | gbs1478    | Pilus island 2                                              | -               | 22.2        | Do                                                                                                                                                                                 |
| 12   | Ca031#0117         | -          | Pilus island 2                                              | -               | 12.3        | Do                                                                                                                                                                                 |
| 13   | Ca031#0104         | -          | agglutinin receptor                                         | -               | 30.7        | Mediates specific adhesion and aggregation (6)                                                                                                                                     |
| 14   | Ca031#0138         | -          | Rib                                                         | -               | 2.0         | GBS surface protein involved in adhesion (7)                                                                                                                                       |

**Table S5. Genes down-regulated in GBS type III compared to GBS type 1a (n=23)**

| <b>S.No</b> | <b>locus name</b> | <b>Gene locus</b> | <b>Gene product name</b> | <b>Gene name</b> | <b>Fold change</b> | <b>Functions</b>                                                                                                                                       |
|-------------|-------------------|-------------------|--------------------------|------------------|--------------------|--------------------------------------------------------------------------------------------------------------------------------------------------------|
| 1           | Ca031#0006        | gbs0631           | Pilus island 1           | -                | 0.3                | Pilus oligomerization and polymerization and sortase enzyme for anchoring at the membrane formation (5, 8)                                             |
| 2           | Ca031#0007        | gbs0632           | Pilus island 1           | -                | 0.3                |                                                                                                                                                        |
| 3           | Ca031#0013        | gbs1234           | Capsule                  | neuD             | 0.5                | Synthesis of capsular polysaccharide (3)                                                                                                               |
| 4           | Ca031#0014        | gbs1235           | Capsule                  | neuC,            | 0.4                | Do                                                                                                                                                     |
| 5           | Ca031#0015        | gbs1236           | Capsule                  | neuB             | 0.2                | Do                                                                                                                                                     |
| 6           | Ca031#0016        | gbs1237           | Capsule                  | cpsM             | 0.5                | Do                                                                                                                                                     |
| 7           |                   | -                 | Capsule                  |                  | 0.00               | Do                                                                                                                                                     |
| 8           | Ca031#0025        | gbs1245           | Capsule                  | cpsC             | 0.4                | Do                                                                                                                                                     |
| 9           | Ca031#0028        | gbs1248           | Capsule                  | -                | 0.2                | Do                                                                                                                                                     |
| 10          | Ca031#0129        | -                 | Capsule                  | -                | 0.3                | Do                                                                                                                                                     |
| 11          | Ca031#0132        | -                 | Capsule                  | -                | 0.2                | Do                                                                                                                                                     |
| 12          | Ca031#0029        | -                 | alpha C protein          | Bca              | 0.4                | An important virulence factor, plays role in interaction with epithelial surfaces and initiation of infection (9, 10).                                 |
| 13          | Ca031#0030        | -                 | $\beta$ -C protein       | Cba              | 0.3                | The $\beta$ protein interacts with two components of the human immune system, IgA-Fc and factor H (FH), suggesting that it plays a role in immune (11) |
| 14          | Ca031#0034        | gbs1308           | C5a peptidase            | scpA/scpB        | 0.3                | Serine protease that inactivates human C5a(12)                                                                                                         |
| 15          | Ca031#0037        | gbs0644           | $\beta$ -hemolysin       | cyIX             | 0.3                | Pore-forming exotoxin (13)                                                                                                                             |
| 16          | Ca031#0038        | gbs0645           | $\beta$ -hemolysin       | cyID             | 0.5                | Do                                                                                                                                                     |
| 17          | Ca031#0039        | gbs0646           | $\beta$ -hemolysin       | cyIG             | 0.5                | Do                                                                                                                                                     |
| 18          | Ca031#0040        | gbs0647           | $\beta$ -hemolysin       | acpC             | 0.4                | Do                                                                                                                                                     |
| 19          | Ca031#0045        | gbs0652           | $\beta$ -hemolysin       | cyIF             | 0.4                | Do                                                                                                                                                     |
| 20          | Ca031#0046        | gbs0653           | $\beta$ -hemolysin       | cyII             | 0.5                | Do                                                                                                                                                     |
| 21          | Ca031#0047        | gbs0654           | $\beta$ -hemolysin       | cyIJ             | 0.6                | Do                                                                                                                                                     |

|           |            |         |                          |      |     |                                                                                                                      |
|-----------|------------|---------|--------------------------|------|-----|----------------------------------------------------------------------------------------------------------------------|
| <b>22</b> | Ca031#0054 | gbs1307 | Laminin-binding protein  | Lmb  | 0.4 | Mediates attachment to human laminin and plays a crucial role in the adhesion/invasion of eukaryotic host cells (14) |
| <b>23</b> | Ca031#0084 | gbs0470 | $\alpha$ - like proteins | alp2 | 0.2 | surface-anchored proteins, inducers of protective antibodies (15, 16)                                                |

**Table S 6: Genes up-regulated in GBS type V compared to GBS type 1a (n=15)**

| S.No | locus name on Chip | Gene locus | Gene product name      | Gene | Fold change | Functions                                                                                               |
|------|--------------------|------------|------------------------|------|-------------|---------------------------------------------------------------------------------------------------------|
| 1    | Ca031#0018         | -          | Capsule                |      | 1.6         | Synthesis of capsular polysaccharide (3)                                                                |
| 2    | Ca031#0026         | -          | Capsule                |      | 1.6         | Do                                                                                                      |
| 3    | Ca031#0128         | SAG1164    | Capsule                | cpsJ | 11.7        | Do                                                                                                      |
| 4    | Ca031#0129         | SAG1165    | Capsule                | cpsO | 3.0         | Do                                                                                                      |
| 5    | Ca031#0130         | SAG1166    | Capsule                | cpsN | 2.3         | Do                                                                                                      |
| 6    | Ca031#0131         | SAG1167    | Capsule                | cpsM | 71.6        | Do                                                                                                      |
| 7    | Ca031#0132         | SAG1168    | Capsule                | cpsH | 8.0         | Do                                                                                                      |
| 8    | Ca031#0055         | -          | Glucan binding protein |      | 23.2        | GbpB may be involved in cell wall synthesis (4)                                                         |
| 9    | Ca031#0060         | SAG1404    | Pilus island 2         |      | 15.2        | Pilus oligomerization and polymerization and sortase enzyme for anchoring at the membrane formation (5) |
| 10   | Ca031#0061         | SAG1405    | Pilus island 2         |      | 14.7        | Do                                                                                                      |
| 11   | Ca031#0062         | SAG1406    | Pilus island 2         |      | 4.5         | Do                                                                                                      |
| 12   | Ca031#0063         | SAG1407    | Pilus island 2         |      | 21.4        | Do                                                                                                      |
| 13   | Ca031#0064         | SAG1408    | Pilus island 2         |      | 17.2        | Do                                                                                                      |
| 14   | Ca031#0084         | -          | $\alpha$ like proteins | Alp2 | 2.5         | Surface-anchored proteins, inducers of protective antibodies (15, 16)                                   |
| 15   | Ca031#0138         | SAG0433    | Rib                    | Rib  | 1.5         | GBS surface protein involved in adhesion (7)                                                            |

**Table S 7: Genes down-regulated in GBS type V compared to GBS type 1a (n=26)**

| S.No | locus name | Gene locus | Gene product name           | Gene | Fold change | Functions                                                                                                                              |
|------|------------|------------|-----------------------------|------|-------------|----------------------------------------------------------------------------------------------------------------------------------------|
| 1    | Ca031#0007 | SAG0649    | Pilus island 1              |      | 0.4         | Pilus oligomerization and polymerization formation (5, 8)                                                                              |
| 2    | Ca031#0117 | -          | Pilus island 2              | -    | 0.3         | Do                                                                                                                                     |
| 3    | Ca031#0010 | SAG1197    | Hyaluronidase               | hylB | 0.4         | Facilitates bacterial invasion by degrading extracellular hyaluronan and may promote persistent colonization of the vagina by GBS (17) |
| 4    | Ca031#0012 | SAG1158    | capsule                     | neuA | 0.4         | Synthesis of capsular polysaccharide (3)                                                                                               |
| 5    | Ca031#0016 | SAG1162    | capsule                     | cpsL | 0.4         | Do                                                                                                                                     |
| 6    | Ca031#0019 | -          | capsule                     | cpsI | 0.0         | Do                                                                                                                                     |
| 7    | Ca031#0020 | -          | capsule                     | -    | 0.0         | Do                                                                                                                                     |
| 8    | Ca031#0025 | SAG1173    | capsule                     | cpsC | 0.4         | Do                                                                                                                                     |
| 9    | Ca031#0027 | -          | capsule                     |      | 0.5         | Do                                                                                                                                     |
| 10   | Ca031#0028 | -          | capsule                     |      | 0.3         | Do                                                                                                                                     |
| 11   | Ca031#0029 | -          | $\alpha$ -C proteins        | Bca  | 0.2         | Interact with epithelial surfaces and initiation of infection (9, 10).                                                                 |
| 12   | Ca031#0030 | -          | $\beta$ - C protein         | Cba  | 0.2         | Interacts with two components of the human immune system, plays a role in immune (11)                                                  |
| 13   | Ca031#0031 | SAG0032    | Surface immunogenic protein | Sip  | 0.3         | Highly conserved protein, potential vaccine candidate, (21, 22).                                                                       |
| 14   | Ca031#0033 | SAG1730    | C3 degrading protease       | cppA | 0.3         | Escapes bacteria from ingestion and killing by PMN cells (23)                                                                          |
| 15   | Ca031#0034 | SAG1236    | C5a peptidase               | -    | 0.6         | Serine protease that inactivates human C5a(12)                                                                                         |
| 16   | Ca031#0035 | SAG2174    | Serine protease             | -    | 0.6         | Diverse role (eg., heat shock protein) (19)                                                                                            |
| 17   | Ca031#0036 | SAG0105    | Trigger factor              | -    | 0.5         | Protein folding of newly synthesized protein (20)                                                                                      |

|           |            |         |                             |   |     |                                                                                     |
|-----------|------------|---------|-----------------------------|---|-----|-------------------------------------------------------------------------------------|
| <b>18</b> | Ca031#0037 | SAG0662 | $\beta$ hemolysin           | - | 0.4 | Pore-forming exotoxin (13)                                                          |
| <b>19</b> | Ca031#0039 | SAG0664 | $\beta$ hemolysin           | - | 0.3 | Do                                                                                  |
| <b>20</b> | Ca031#0043 | SAG0668 | $\beta$ hemolysin           | - | 0.4 | Do                                                                                  |
| <b>21</b> | Ca031#0045 | SAG0670 | $\beta$ hemolysin           | - | 0.3 | Do                                                                                  |
| <b>23</b> | Ca031#0046 | SAG0671 | $\beta$ hemolysin           | - | 0.4 | Do                                                                                  |
| <b>24</b> | Ca031#0049 | SAG2043 | CAMP factor                 | - | 0.4 | Pore-forming toxin, useful in identification of GBS in the clinical laboratory (13) |
| <b>25</b> | Ca031#0054 | SAG1234 | Laminin-binding protein     | - | 0.6 | and plays a crucial role in the adhesion/invasion of eukaryotic host cells (14)     |
| <b>26</b> | Ca031#0106 | SAG1052 | Fibronectin Binding protein | - | 0.3 | Binds to human plasma fibronectin (18)                                              |

**Table S8: Genes up-regulated in GBS type VII compared to GBS type 1a (n=16)**

| <b>S.No</b> | <b>locus name</b> | <b>Gene product name</b>             | <b>Gene</b> | <b>Fold change</b> | <b>Functions</b>                                                                                                                                                                   |
|-------------|-------------------|--------------------------------------|-------------|--------------------|------------------------------------------------------------------------------------------------------------------------------------------------------------------------------------|
| 1           | Ca031#0004        | Pilus island 1                       | -           | 1.6                | Pilus oligomerization and polymerization and sortase enzyme for anchoring at the membrane formation (5, 8)                                                                         |
| 2           | Ca031#0064        | Pilus island 2                       | -           | 1.7                | Do                                                                                                                                                                                 |
| 3           | Ca031#0009        | Streptococcal plasmin receptor/GAPDH | plr/gapA    | 2.8                | GAPDH, glycolytic enzyme used for bacterial energy generation, bind several host proteins, confer resistance against reactive oxygen species produced by host phagocytic cells (1) |
| 4           | Ca031#0010        | Hyaluronidase                        | hylB        | 2.2                | Facilitates bacterial invasion by degrading extracellular hyaluronan and may promote persistent colonization of the vagina by GBS (17)                                             |
| 5           | Ca031#0011        | Streptococcal enolase                | Eno         | 2.8                | Glycolytic enzyme $\alpha$ -enolase as a plasmin binding protein on the outside of the bacterial cell (2)                                                                          |
| 6           | Ca031#0012        | Capsule                              | neuA        | 2.3                | Synthesis of capsular polysaccharide (3)                                                                                                                                           |
| 7           | Ca031#0016        | Capsule                              | cpsL        | 1.9                | Do                                                                                                                                                                                 |
| 8           | Ca031#0026        | Capsule                              | cpsB        | 1.6                | Do                                                                                                                                                                                 |
| 9           | Ca031#0076        | Capsule                              | -           | 3.8                | Do                                                                                                                                                                                 |
| 10          | Ca031#0131        | Capsule                              | -           | 3.7                | Do                                                                                                                                                                                 |
| 11          | Ca031#0029        | $\alpha$ C protein                   | Bca         | 1.5                | An important virulence factor, plays role in interaction with epithelial surfaces and initiation of infection (9, 10)                                                              |
| 12          | Ca031#0033        | C3-degrading protease                | cppA        | 1.8                | Stops C3 deposition on bacterial cells and thereby escapes bacteria from ingestion and killing by PMN cells (23)                                                                   |
| 13          | Ca031#0036        | Trigger factor                       | tig/ropA    | 1.7                | Protein folding of newly synthesized protein (20)                                                                                                                                  |
| 14          | Ca031#0049        | CAMP factor                          | cfa/cfb     | 3.7                | Pore-forming toxin, useful in identification of GBS in the clinical laboratory (13)                                                                                                |
| 15          | Ca031#0055        | Glucan binding protein               | gbpB        | 27.5               | Mediates attachment to human laminin and plays a crucial role in the adhesion/invasion of eukaryotic host cells (14)                                                               |
| 16          | Ca031#0084        | $\alpha$ -like protein               | alp2        | 7.3                | surface-anchored proteins, inducers of protective antibodies (15, 16)                                                                                                              |



**Table S9: Genes down-regulated in GBS type VII compared to GBS type 1a (n=11)**

| <b>S.No</b> | <b>locus name</b> | <b>Gene product name</b>    | <b>Gene</b> | <b>Fold change</b> | <b>Function</b>                                                                                                      |
|-------------|-------------------|-----------------------------|-------------|--------------------|----------------------------------------------------------------------------------------------------------------------|
| <b>1</b>    | Ca031#0005        | Pilus island 1              | -           | 0.5                | Pilus oligomerization and polymerization and sortase enzyme for anchoring at the membrane formation (5, 8)           |
| <b>2</b>    | Ca031#0015        | Capsule                     | neuB        | 0.5                | Synthesis of capsular polysaccharide (3)                                                                             |
| <b>3</b>    | Ca031#0017        | Capsule                     | cpsK        | 0.4                | Do                                                                                                                   |
| <b>4</b>    | Ca031#0018        | Capsule                     | cpsJ        | 0.4                | Do                                                                                                                   |
| <b>5</b>    | Ca031#0019        | Capsule                     | cpsI        | 0.0                | Do                                                                                                                   |
| <b>6</b>    | Ca031#0020        | Capsule                     | cpsH        | 0.0                | Do                                                                                                                   |
| <b>7</b>    | Ca031#0021        | Capsule                     | cpsG        | 0.5                | Do                                                                                                                   |
| <b>8</b>    | Ca031#0129        | Capsule                     | -           | 0.5                | Do                                                                                                                   |
| <b>9</b>    | Ca031#0034        | C5a peptidase               | scpA/scpB   | 0.2                | Serine protease that inactivates human C5a (12)                                                                      |
| <b>10</b>   | Ca031#0054        | Fibronectin binding protein | fbsA        | 0.1                | Mediates attachment to human laminin and plays a crucial role in the adhesion/invasion of eukaryotic host cells (14) |
| <b>11</b>   | Ca031#0106        | Fibronectin binding protein | fbsB        | 0.6                | Binds to human plasma fibronectin (18)                                                                               |

**Table S10: Genes up-regulated in GBS type V compared to GBS type III (n=19)**

| S.No | locus name on Chip | Gene locus | Gene product name            | Gene      | Fold change | Functions                                                                                                  |
|------|--------------------|------------|------------------------------|-----------|-------------|------------------------------------------------------------------------------------------------------------|
| 1    | Ca031#0004         | SAG0646    | Pilus island 1               | -         | 1.6         | Pilus oligomerization and polymerization and sortase enzyme for anchoring at the membrane formation (5, 8) |
| 2    | Ca031#0006         | SAG0648    | Pilus island 1               | -         | 2.4         | Do                                                                                                         |
| 3    | Ca031#0007         | SAG0649    | Pilus island 1               | -         | 1.5         | Do                                                                                                         |
| 4    | Ca031#0063         | -          | Pilus island 2               | -         | 31.9        | Do                                                                                                         |
| 5    | Ca031#0013         | SAG1159    | Capsule                      | neuD      | 1.7         | Synthesis of capsular polysaccharide (3)                                                                   |
| 6    | Ca031#0014         | SAG1160    | Capsule                      | neuC      | 2.4         | Do                                                                                                         |
| 7    | Ca031#0015         | SAG1161    | Capsule                      | neuB      | 4.0         | Do                                                                                                         |
| 8    | Ca031#0018         | -          | Capsule                      | -         | 2.0         | Do                                                                                                         |
| 9    | Ca031#0020         | -          | Capsule                      | -         | 2.1         | Do                                                                                                         |
| 10   | Ca031#0021         | -          | Capsule                      | cpsG      | 1.5         | Do                                                                                                         |
| 11   | Ca031#0028         | -          | Capsule                      | -         | 1.6         | Do                                                                                                         |
| 12   | Ca031#0128         | SAG1164    | Capsule                      | cpsJ      | 10.2        | Do                                                                                                         |
| 13   | Ca031#0129         | SAG1165    | Capsule                      | cpsO      | 8.7         | Do                                                                                                         |
| 14   | Ca031#0131         | SAG1167    | Capsule                      | cpsM      | 71.6        | Do                                                                                                         |
| 15   | Ca031#0132         | SAG1168    | Capsule                      | cpsH      | 29.9        | Do                                                                                                         |
| 16   | Ca031#0084         | -          | $\alpha$ -like protein       | alp2      | 12.3        | Surface-anchored proteins, inducers of protective antibodies (15, 16)                                      |
| 17   | Ca031#0034         | SAG1236    | C5a peptidase                | scpA/scpB | 1.6         | Serine protease that inactivates human C5a (12)                                                            |
| 18   | Ca031#0038         | SAG0663    | $\beta$ -hemolysin/cytolysin | cylD      | 1.5         | Pore-forming exotoxin (13)                                                                                 |
| 19   | Ca031#0040         | SAG0665    | $\beta$ -hemolysin/cytolysin | acpC      | 3.1         | Do                                                                                                         |

**Table S11: Genes down-regulated in GBS type V compared to GBS type III (n=20)**

| S.No | locus name | Gene locus | Gene product name                                           | Gene     | Fold change | Functions                                                                                                                                                                          |
|------|------------|------------|-------------------------------------------------------------|----------|-------------|------------------------------------------------------------------------------------------------------------------------------------------------------------------------------------|
| 1    | Ca031#0009 | SAG1768    | Streptococcal plasmin receptor/GAPDH                        | plr/gapA | 0.5         | GAPDH, glycolytic enzyme used for bacterial energy generation, bind several host proteins, confer resistance against reactive oxygen species produced by host phagocytic cells (1) |
| 2    | Ca031#0010 | SAG1197    | Hyaluronidase                                               | hylB     | 0.5         | Facilitates bacterial invasion by degrading extracellular hyaluronan and may promote persistent colonization of the vagina by GBS ( 17)                                            |
| 3    | Ca031#0010 | SAG0628    | Streptococcal enolase                                       | eno      | 0.3         | Glycolytic enzyme $\alpha$ -enolase as a plasmin binding protein on the outside of the bacterial cell (2)                                                                          |
| 4    | Ca031#0012 | SAG1158    | Capsule                                                     | neuA     | 0.4         | Synthesis of capsular polysaccharide (3)                                                                                                                                           |
| 5    | Ca031#0019 | -          | Capsule                                                     | -        | 0.0         | Do                                                                                                                                                                                 |
| 6    | Ca031#0027 | -          | Capsule                                                     | -        | 0.6         | Do                                                                                                                                                                                 |
| 7    | Ca031#0076 | -          | Capsule                                                     | -        | 0.02        | Do                                                                                                                                                                                 |
| 8    | Ca031#0130 | SAG1166    | Capsule                                                     | cpsN     | 0.3         | Do                                                                                                                                                                                 |
| 9    | Ca031#0029 | -          | $\alpha$ - C protein                                        | bca      | 0.6         | An important virulence factor, plays role in interaction with epithelial surfaces and initiation of infection (9, 10).                                                             |
| 10   | Ca031#0031 | SAG0032    | Surface immunogenic protein                                 | sip      | 0.5         | Highly conserved protein, potential vaccine candidate, (21, 22)                                                                                                                    |
| 11   | Ca031#0032 | SAG1533    | Pneumococcal surface antigen A / Metal binding protein SloC | psaA     | 0.5         | Essential virulence factor, a metal ( $Mn^{2+}$ and $Zn^{2+}$ ) Binding protein (ABC-type),<br>Potential drug target and a candidate vaccine component (24)                        |
| 12   | Ca031#0033 | SAG1730    | C3-degrading protease                                       | cppA     | 0.3         | Stops C3 deposition on bacterial cells and thereby escapes bacteria from ingestion and killing by PMN cells ( 23)                                                                  |
| 13   | Ca031#0036 | SAG0105    | Trigger factor                                              | tig/ropA | 0.3         | Protein folding of newly synthesized protein (20)                                                                                                                                  |
| 14   | Ca031#0039 | SAG0664    | $\beta$ -hemolysin/cytolysin                                | cylG     | 0.5         | Pore-forming exotoxin (13)                                                                                                                                                         |
| 15   | Ca031#0043 | SAG0668    | $\beta$ -hemolysin/cytolysin                                | cylB     | 0.5         | Do                                                                                                                                                                                 |
| 16   | Ca031#0049 | SAG2043    | CAMP factor                                                 | cfa/cfb  | 0.3         | Pore-forming toxin, useful in identification of GBS in the clinical laboratory (13)                                                                                                |
| 17   | Ca031#0055 | -          | Glucan binding protein                                      | lmb      | 0.6         | Mediates attachment to human laminin and plays a crucial role in the adhesion/invasion of eukaryotic host cells (14)                                                               |

|           |            |         |                             |       |      |                                                                                                           |
|-----------|------------|---------|-----------------------------|-------|------|-----------------------------------------------------------------------------------------------------------|
| <b>18</b> | Ca031#0104 | -       | agglutinin receptor         | -     | 0.02 | Mediates specific adhesion and aggregation ( 6)                                                           |
| <b>19</b> | Ca031#0106 | SAG1052 | Fibronectin binding protein | fbs A | 0.4  | Binds to human plasma fibronectin (18)                                                                    |
| <b>20</b> | Ca031#0117 | -       | Pilus island 2              | -     | 0.0  | Pilus oligomerization and polymerization and sortase enzyme for anchoring at the membrane formation(5, 8) |

**Table S12: Genes up-regulated in GBS type VII compared to GBS type III (n=28)**

| S.No | locus name | Gene locus | Gene product name                    | Gene      | Fold Change | Function                                                                                                                                               |
|------|------------|------------|--------------------------------------|-----------|-------------|--------------------------------------------------------------------------------------------------------------------------------------------------------|
| 1    | Ca031#0004 | gbs0629    | Pilus Island1                        | -         | 1.8         | Pilus oligomerization and polymerization (5, 8)                                                                                                        |
| 2    | Ca031#0006 | gbs0631    | Pilus Island1                        | -         | 2.2         | Do                                                                                                                                                     |
| 3    | Ca031#0007 | gbs0632    | Pilus Island1                        | -         | 3.8         | Do                                                                                                                                                     |
| 4    | Ca031#0009 | gbs1811    | Streptococcal plasmin receptor/GAPDH | plr/gapA  | 1.5         | GAPDH, bind several host proteins, confer resistance against reactive oxygen species produced by host phagocytic cells (1)                             |
| 5    | Ca031#0010 | gbs1270    | Hyaluronidase                        | hylB      | 2.9         | Facilitates bacterial invasion by degrading extracellular hyaluronan and may promote persistent colonization of the vagina by GBS (17)                 |
| 6    | Ca031#0012 | gbs1233    | Capsule                              | neuA      | 2.8         | Synthesis of capsular polysaccharide (3)                                                                                                               |
| 7    | Ca031#0013 | gbs1234    | Capsule                              | neuD      | 1.8         | Do                                                                                                                                                     |
| 8    | Ca031#0014 | gbs1235    | Capsule                              | neuC,     | 2.1         | Do                                                                                                                                                     |
| 9    | Ca031#0015 | gbs1236    | Capsule                              | neuB      | 2.5         | Do                                                                                                                                                     |
| 10   | Ca031#0016 | gbs1237    | Capsule                              | cpsM      | 3.7         | Do                                                                                                                                                     |
| 11   | Ca031#0023 | gbs1243    | Capsule                              | cpsE      | 1.7         | Do                                                                                                                                                     |
| 12   | Ca031#0025 | gbs1245    | Capsule                              | cpsC      | 2.3         | Do                                                                                                                                                     |
| 13   | Ca031#0028 | -          | Capsule                              | -         | 3.3         | Do                                                                                                                                                     |
| 14   | Ca031#0129 | -          | Capsule                              | cpsO      | 1.5         | Do                                                                                                                                                     |
| 15   | Ca031#0131 | -          | Capsule                              | cpsM      | 3.7         | Do                                                                                                                                                     |
| 16   | Ca031#0132 | -          | Capsule                              | cpsH      | 4.4         | Do                                                                                                                                                     |
| 17   | Ca031#0029 | -          | $\alpha$ -C protein                  | Bca       | 3.6         | In interaction with epithelial surfaces and initiation of infection (10)                                                                               |
| 18   | Ca031#0030 | -          | $\beta$ - C protein                  | Cba       | 2.0         | The $\beta$ protein interacts with two components of the human immune system, IgA-Fc and factor H (FH), suggesting that it plays a role in immune (11) |
| 19   | Ca031#0033 | gbs1775    | C3-degrading protease                | cpsA      | 1.8         | Escapes bacteria from ingestion and killing by PMN cells ( 23)                                                                                         |
| 20   | Ca031#0035 | gbs2133    | Serine protease                      | htrA/degP | 1.6         | Diverse role (eg., heat shock protein) (19)                                                                                                            |

|           |            |         |                              |         |      |                                                                                     |
|-----------|------------|---------|------------------------------|---------|------|-------------------------------------------------------------------------------------|
| <b>21</b> | Ca031#0037 | gbs0644 | $\beta$ -hemolysin/cytolysin | cylX    | 3.4  | Pore-forming exotoxin (13)                                                          |
| <b>22</b> | Ca031#0038 | gbs0645 | $\beta$ -hemolysin/cytolysin | cylD    | 1.9  | Do                                                                                  |
| <b>23</b> | Ca031#0040 | gbs0647 | $\beta$ -hemolysin/cytolysin | acpC    | 1.9  | Do                                                                                  |
| <b>24</b> | Ca031#0045 | gbs0652 | $\beta$ -hemolysin/cytolysin | cylF    | 2.3  | Do                                                                                  |
| <b>25</b> | Ca031#0046 | gbs0653 | $\beta$ -hemolysin/cytolysin | cylI    | 2.3  | Do                                                                                  |
| <b>26</b> | Ca031#0047 | gbs0654 | $\beta$ -hemolysin/cytolysin | cylJ    | 1.7  | Do                                                                                  |
| <b>27</b> | Ca031#0049 | gbs2000 | CAMP factor                  | cfa/cfb | 2.8  | Pore-forming toxin, useful in identification of GBS in the clinical laboratory (13) |
| <b>28</b> | Ca031#0084 | -       | $\alpha$ -like protein       | alp2    | 36.2 | Surface-anchored proteins, inducers of protective antibodies (15)                   |

**Table S13: Genes down-regulated in GBS type VII compared to GBS type III (n=16)**

| S.No. | locus name on Chip | Gene locus | Gene product name                                           | Gene   | Fold change | Functions                                                                                                                                                             |
|-------|--------------------|------------|-------------------------------------------------------------|--------|-------------|-----------------------------------------------------------------------------------------------------------------------------------------------------------------------|
| 1     | Ca031#0017         | gbs1237.1  | Capsule                                                     | cpsL   | 0.4         | Synthesis of capsular polysaccharide (3)                                                                                                                              |
| 2     | Ca031#0018         | gbs1238    | Capsule                                                     | cps1aJ | 0.6         | Do                                                                                                                                                                    |
| 3     | Ca031#0019         | gbs1239    | Capsule                                                     | cpsJ   | 0.0         | Do                                                                                                                                                                    |
| 4     | Ca031#0020         |            | Capsule                                                     | -      | 0.5         | Do                                                                                                                                                                    |
| 5     | Ca031#0022         | gbs1242    | Capsule                                                     | cpsF   | 0.4         | Do                                                                                                                                                                    |
| 6     | Ca031#0076         | gbs1240    | Capsule                                                     | cpsI   | 0.0         | Do                                                                                                                                                                    |
| 7     | Ca031#0032         | gbs1589    | Pneumococcal surface antigen A / Metal binding protein SloC | psaA   | 0.6         | Essential virulence factor, a metal (Mn <sup>2+</sup> and Zn <sup>2+</sup> ) Binding protein (ABC-type), Potential drug target and a candidate vaccine component (24) |
| 8     | Ca031#0054         | gbs1307    | Laminin-binding protein                                     | Lmb    | 0.3         | Mediates attachment to human laminin and plays a crucial role in the adhesion/invasion of eukaryotic host cells (14)                                                  |
| 9     | Ca031#0060         | gbs1474    | Pilus Island2                                               | -      | 0.0         | Pilus oligomerization and polymerization and sortase enzyme for anchoring at the membrane formation (5, 8)                                                            |
| 10    | Ca031#0061         | gbs1475    | Pilus Island2                                               | -      | 0.0         | Do                                                                                                                                                                    |
| 11    | Ca031#0062         | gbs1476    | Pilus Island2                                               | -      | 0.1         | Do                                                                                                                                                                    |
| 12    | Ca031#0064         | gbs1478    | Pilus Island2                                               | -      | 0.0         | Do                                                                                                                                                                    |
| 13    | Ca031#0117         | -          | Pilus Island2                                               | -      | 0.1         | Do                                                                                                                                                                    |
| 14    | Ca031#0104         | -          | Agglutinin receptor                                         | -      | 0.0         | Mediates specific adhesion and aggregation (6)                                                                                                                        |
| 15    | Ca031#0130         | -          | Capsule                                                     | -      | 0.1         | Synthesis of capsular polysaccharide (3)                                                                                                                              |
| 16    | Ca031#0138         | -          | Rib                                                         | -      | 0.4         | GBS surface protein involved in adhesion (7)                                                                                                                          |

**Table S14: Genes up-regulated in GBS type VII compared to GBS type V (n=28)**

| S.No | locus name | Gene locus | Gene product name                    | Gene      | Fold change | Functions                                                                                                                                                                                                                                                                                                                     |
|------|------------|------------|--------------------------------------|-----------|-------------|-------------------------------------------------------------------------------------------------------------------------------------------------------------------------------------------------------------------------------------------------------------------------------------------------------------------------------|
| 1    | Ca031#0007 | SAG0649    | Pilus Island1                        |           | 2.5         | Pilus oligomerization and polymerization (5, 8)                                                                                                                                                                                                                                                                               |
| 2    | Ca031#0117 | -          | Pilus Island2                        | -         | 3.6         | Do                                                                                                                                                                                                                                                                                                                            |
| 3    | Ca031#0009 | SAG1768    | Streptococcal plasmin receptor/GAPDH | plr/gapA  | 2.7         | GAPDH, glycolytic enzyme used for bacterial energy generation, bind several host proteins, confer resistance against reactive oxygen species produced by host phagocytic cells (1)<br>Facilitates bacterial invasion by degrading extracellular hyaluronan and may promote persistent colonization of the vagina by GBS ( 17) |
| 4    | Ca031#0010 | SAG1197    | Hyaluronidase                        | hylB      | 5.2         | Glycolytic enzyme $\alpha$ -enolase as a plasmin binding protein on the outside of the bacterial cell (2)                                                                                                                                                                                                                     |
| 5    | Ca031#0011 | SAG0628    | Streptococcal enolase                | eno       | 3.9         | Synthesis of capsular polysaccharide (3)                                                                                                                                                                                                                                                                                      |
| 6    | Ca031#0012 | SAG1158    | Capsule                              | neuA      | 5.8         | Do                                                                                                                                                                                                                                                                                                                            |
| 7    | Ca031#0016 | SAG1162    | Capsule                              | neuB      | 4.0         | Do                                                                                                                                                                                                                                                                                                                            |
| 8    | Ca031#0019 |            | Capsule                              | cpsI      | 2.4         | Do                                                                                                                                                                                                                                                                                                                            |
| 9    | Ca031#0023 | SAG1171    | Capsule                              | cpsE      | 1.5         | Do                                                                                                                                                                                                                                                                                                                            |
| 10   | Ca031#0025 | SAG1173    | Capsule                              | cpsC      | 2.1         | Do                                                                                                                                                                                                                                                                                                                            |
| 11   | Ca031#0027 | -          | Capsule                              | cpsX      | 1.7         | Do                                                                                                                                                                                                                                                                                                                            |
| 12   | Ca031#0028 | -          | Capsule                              | cpsY      | 2.0         | Do                                                                                                                                                                                                                                                                                                                            |
| 13   | Ca031#0076 | -          | Capsule                              | alp2      | 2.8         | Do                                                                                                                                                                                                                                                                                                                            |
| 14   | Ca031#0029 | -          | $\alpha$ -C protein                  | bca       | 5.9         | Interaction with epithelial surfaces and initiation of infection (9, 10)                                                                                                                                                                                                                                                      |
| 15   | Ca031#0030 | -          | $\beta$ - C protein                  | cba       | 2.7         | The $\beta$ protein interacts with two components of the human immune system, IgA-Fc and factor H (FH), suggesting that it plays a role in immune (11)                                                                                                                                                                        |
| 16   | Ca031#0031 | SAG0032    | Surface immunogenic protein          | sip       | 1.7         | Highly conserved protein, potential vaccine candidate, (21, 22)                                                                                                                                                                                                                                                               |
| 17   | Ca031#0033 | SAG1730    | C3-degrading protease                | cppA      | 4.7         | Escapes bacteria from ingestion and killing by PMN cells ( 23)                                                                                                                                                                                                                                                                |
| 18   | Ca031#0035 | SAG2174    | Serine protease                      | htrA/degP | 1.7         | Diverse role (eg., heat shock protein) (19)                                                                                                                                                                                                                                                                                   |
| 19   | Ca031#0036 | SAG0105    | Trigger factor                       | tig/ropA  | 3.3         | Protein folding of newly synthesized protein (20)                                                                                                                                                                                                                                                                             |



|           |            |         |                              |         |     |                                                                                     |
|-----------|------------|---------|------------------------------|---------|-----|-------------------------------------------------------------------------------------|
| <b>20</b> | Ca031#0037 | SAG0662 | $\beta$ -hemolysin/cytolysin | cylX    | 2.6 | Pore-forming exotoxin (13)<br>Do<br>Do<br>Do<br>Do<br>Do                            |
| <b>21</b> | Ca031#0039 | SAG0664 | $\beta$ -hemolysin/cytolysin | cylG    | 2.5 |                                                                                     |
| <b>22</b> | Ca031#0043 | SAG0668 | $\beta$ -hemolysin/cytolysin | cylB    | 1.8 |                                                                                     |
| <b>23</b> | Ca031#0045 | SAG0670 | $\beta$ -hemolysin/cytolysin | cylF    | 2.7 |                                                                                     |
| <b>24</b> | Ca031#0046 | SAG0671 | $\beta$ -hemolysin/cytolysin | cylI    | 2.4 |                                                                                     |
|           | Ca031#0047 | SAG0672 | $\beta$ -hemolysin/cytolysin | cylJ    | 2.3 |                                                                                     |
| <b>26</b> | Ca031#0049 | SAG2043 | CAMP factor                  | cfa/cfb | 9.3 | Pore-forming toxin, useful in identification of GBS in the clinical laboratory (13) |
| <b>27</b> | Ca031#0084 | -       | $\alpha$ -like protein       | fbsA    | 2.9 | Surface-anchored proteins, inducers of protective antibodies (15)                   |
| <b>28</b> | Ca031#0106 | SAG1052 | Fibronectin Binding protein  | -       | 1.8 | Binds to human plasma fibronectin (18)                                              |

**Table S15: Genes down-regulated in GBS type VII compared to GBS type V (n=21)**

| S.No | Locus name on Chip | Gene locus | Gene product name            | Gene      | Fold change | Functions                                                                                                            |
|------|--------------------|------------|------------------------------|-----------|-------------|----------------------------------------------------------------------------------------------------------------------|
| 1    | Ca031#0015         | SAG1161    | Capsule                      | cpsL      | 0.6         | Synthesis of capsular polysaccharide (3)                                                                             |
| 2    | Ca031#0017         | SAG1163    | Capsule                      | cpsK      | 0.3         | Do                                                                                                                   |
| 3    | Ca031#0018         | -          | Capsule                      | cpsJ      | 0.3         | Do                                                                                                                   |
| 4    | Ca031#0020         | -          | Capsule                      | cpsH      | 0.2         | Do                                                                                                                   |
| 5    | Ca031#0021         | SAG1169    | Capsule                      | cpsG      | 0.4         | Do                                                                                                                   |
| 6    | Ca031#0022         | SAG1170    | Capsule                      | cpsF      | 0.6         | Do                                                                                                                   |
| 7    | Ca031#0128         | SAG1164    | Capsule                      | cpsO      | 0.0         | Do                                                                                                                   |
| 8    | Ca031#0129         | SAG1165    | Capsule                      | cpsN      | 0.1         | Do                                                                                                                   |
| 9    | Ca031#0130         | SAG1166    | Capsule                      | cpsM      | 0.3         | Do                                                                                                                   |
| 10   | Ca031#0131         | SAG1167    | Capsule                      | cpsH      | 0.0         | Do                                                                                                                   |
| 11   | Ca031#0132         | SAG1168    | Capsule                      | Rib       | 0.1         | Do                                                                                                                   |
| 12   | Ca031#0034         | SAG1236    | C5a peptidase                | scpA/scpB | 0.4         | Serine protease that inactivates human C5a(12)                                                                       |
| 13   | Ca031#0040         | SAG0665    | $\beta$ -hemolysin/cytolysin | acpC      | 0.6         | Pore-forming exotoxin (13)                                                                                           |
| 14   | Ca031#0054         | SAG1234    | Laminin-binding protein      | Lmb       | 0.2         | Mediates attachment to human laminin and plays a crucial role in the adhesion/invasion of eukaryotic host cells (14) |
| 15   | Ca031#0060         | SAG1404    | Pilus Island2                | -         | 0.0         | Pilus oligomerization and polymerization and sortase enzyme for anchoring at the membrane formation (5)              |
| 16   | Ca031#0061         | SAG1405    | Pilus Island2                | -         | 0.0         | Do                                                                                                                   |
| 17   | Ca031#0062         | SAG1406    | Pilus Island2                | -         | 0.2         | Do                                                                                                                   |
| 18   | Ca031#0063         | SAG1407    | Pilus Island2                | -         | 0.0         | Do                                                                                                                   |
| 19   | Ca031#0064         | SAG1408    | Pilus Island2                | cpsJ      | 0.1         | Do                                                                                                                   |
| 20   | Ca031#0005         | SAG0647    | Pilus Island1                | -         | 0.5         | Do                                                                                                                   |
| 21   | Ca031#0138         | SAG0433    | Rib                          | -         | 0.5         | GBS surface protein involved in adhesion (7)                                                                         |

## References

1. Madureira, P., Baptista, M., Vieira, M., Magalha, V., Camelo, A., Oliveira, L., Ribeiro, A., Tavares, D., Cuot, P. T., Vilanova, M. and Ferreira, P. (2007) *J. Immunol.* 178, 1379–1387
2. Pancholi, V. and Fischetti, V. A. (1998) *J. Biol. Chem.* 273, 14503–14515
3. Cieslewicz, M. J., Kasper, D. L., Wang, Y. and Wessel, M. R. (2001) *J. Biol. Chem.* 276, 139-146
4. Mattos-Graner, R. O., Dani, A. P. and Duncan, M. J. (2006) *J. Bacteriol.* 188, 3813–3825
5. Lauer, P., Rinaudo, C. D., Soriani, M., Margarit, I., Maione, D., Rosini, R., Taddei, A. R., Mora, M., Rappuoli, R., Grandi, G. and Telford, J. L. (2005) *Science.* 309, 105
6. Prakobphol, A., Xu, F., Hoang, V. M., Larsson, T., Bergstrom, J., Johansson, I., Frangsmyr, L., Holmskov, U., Leffler, H., Nilsson, V., Boren, T., Wright, J. R., Stromberg, N. and Fishera, S. J. (2000) *J. Biol. Chemist.* 275, 39860–39866
7. Larsson, C., Holmgren, J., Lindahl, G. and Bergquist, C. (2004) *Infect. Immun.* 72, 1184–1187
8. Rosini, R., Rinaudo, C. D., Soriani, M., Lauer, P., Mora, M., Maione, D., Taddei, A., Santi, I., Ghezzi, C., Brettoni, C., Buccato, S., Margarit, I., Grandi, G. and Telford, J.L. (2006) *Mol. Microbiol.* 61, 126-141
9. Bolduc, G. R., Baron, M. J., Gravekamp, C., Lachenauer, C. S. and Madoff, L. C. (2002) *Cell. Microbiol.* 4, 751-758
10. Baron, M. J., Bolduc, G. R., Goldberg, M. B., Auperin, T. C. and Madoff, L. C. (2004) *J. Biol. Chem.* 279, 24714-24723
11. Lindahl, G., Stalhammar-Carlemalm, M. and Areschoug, T. (2005) *Clin. Microbiol. Rev.* 18, 102-127
12. Bohnsack, J. F., Mollison, K. W., Buko, A. M., Ashworth, J. C. and Hill, H. R. (1991) *Biochem. J.* 273, 635-640
13. Hensler, M. E., Miyamoto S. and Nizet, V. (2008) *PLoS One.* 3, 2466
14. Ragunathan, P., Spellerberg, B. and Ponnuraj, K. (2009) *Acta. Crystallogr. Sect. F Struct. Biol. Cryst. Commun.* 65, 492-494
15. Maeland, J. A., Bevanger, L. and Lyng, R. V. (2004) *Clin. Diagnos. Laborat. Immunol.* 11, 1035–1039
16. Lachenauer, C. S., Creti, R., Michel, J. L., Madoff, L. C. (2000) *Proc. Natl. Acad. Sci. U.S.A.* 97, 9630–9635
17. Sukhnanand, S., Dogan, B., Ayodele, M. O., Zadoks, R. N., Craver, M. P. J., Dumas, N. B., Schukken, Y. H., Boor, K. J. and Wiedmann, M. (2005) *J. Clin. Microbiol.* 43, 1177–1186
18. Butler, K. M., Baker, C. J. and Edwards, M. S. (1987) *Infect. Immun.* 55, 2404-2408
19. Nair, S., Poyart, C. and Beretti, J. L., Veiga-Fernandes, H., Berche, P., Trieu-Cuot, P. (2003) *Microbiol.* 149, 407–417
20. Deuerling, E., Schulze-Specking, A., Tomoyasu, T., Mogk, A., Bukau, B. (1999) *Nature.* 400, 693–696
21. Rioux, S., Martin, D., Ackermann, H. W., Dumont, J., Hamel, J. and Brodeur, B. R. (2001) *Infect. Immun.* 69, 5162-5165
22. Brodeur, B. R., Boyer, M., Charlebois, I., Hamel, J., Couture, F., Rioux, R. C. and Martin, D. (2000) *Infect. Immun.* 68, 5610–5618
23. Rainard, P. and Boulard, C. (1992) *Infect. Immun.* 60, 4801-4808
24. Lawrence, M. C., Pilling, P. A., Epa, V. C., Berry, A. M., Ogunniyi, A. D. and Paton, J. C. (1998) *Structure.* 6, 1553–1561
