# Supplementary material
Source: PubMed Central journal article supplement (PMC3567654)
Supplement: supp_M112.425728_jbc.M112.425728-2.pdf [file supp_M112.425728_jbc.M112.425728-2.pdf]

## Supplementary Information II

**Table 1: List of primers used for PCR**

| Gene                    | Primer name | Primer sequence                          | R.E. site     |
|-------------------------|-------------|------------------------------------------|---------------|
| <b>GBS80<br/>Δ1467</b>  | 80-1        | TCAGGATCCGCAACAATCTGTTCTGAC              | <i>Bam HI</i> |
|                         | 80-2        | CCCCCGGGGGCGTTCTTGTGACACTTCTGC           | <i>XmaI</i>   |
|                         | 80-3        | CCCCCGGGGGGCTATCGGTGCTGCGGTG             | <i>XmaI</i>   |
|                         | 80-4        | CGGGATCCAAATGCCAAAACAAGGAAACCCGC         | <i>Bam HI</i> |
|                         | d80-F       | AATGGTGGCGGGGTCAAC                       |               |
|                         | d80-R       | TCTTTAGGGGCAATCTCCAACCTG                 |               |
| <b>SAN1518<br/>Δ840</b> | San-1       | CGCGGATCCGATATATCAGTATTAGTGATTTCTACGGGAG | <i>Bam HI</i> |
|                         | San-2       | CGGGGATCCTCATCCATATGCGTTACGCGG           | <i>BamHI</i>  |
| <b>GBS67<br/>Δ2538</b>  | 67-1        | CGGGGATCCAAGCAGTTGCACAAGATAGTCC          | <i>Bam HI</i> |
|                         | 67-2        | CCCCCGGGGGGTGGAGCTATGATGTCTATTG          | <i>XmaI</i>   |
|                         | 67-3        | CCCCCGGGGGAACATTGTTATTAAGCGGTATTTG       | <i>XmaI</i>   |
|                         | 67-4        | CGCGGATCCTGGTGTCAATCCAGACACGG            | <i>Bam HI</i> |
|                         | d67-F       | AAAGGGGTGAGTAAGGGACAAC                   |               |
|                         | D67-R       | TAATACACCGCAGCACCCTC                     |               |

**Table 2: Plasmids used for development of isogenic mutants**

| Plasmid                 | Description                                                                     | Reference               |
|-------------------------|---------------------------------------------------------------------------------|-------------------------|
| pJRS233                 | Thermosensitive and erythromycin resistance                                     | Perez-Casal et al, 1993 |
| pJRS233Δ <i>gbs80</i>   | pJRS233 containing in-frame deleted <i>gbs80</i> gene of <i>S. agalactiae</i>   | This study              |
| pJRS233Δ <i>san1518</i> | pJRS233 containing in-frame deleted <i>san1518</i> gene of <i>S. agalactiae</i> | This study              |
| pJRS233Δ <i>gbs67</i>   | pJRS233 containing in-frame deleted <i>gbs67</i> gene of <i>S. agalactiae</i>   | This study              |

**Reference:**

Perez-Casal J, Price JA, Maguin E and Scott JR (1993) An M protein with a single C repeat prevents phagocytosis of *Streptococcus pyogenes*: use of a temperature-sensitive shuttle vector to deliver homologous sequence to the chromosome of *S. pyogenes*. *Mol Microbiol*, **8**, 809–819.
